# Supplementary material for: Aptamer-based colorimetric detection of the DNA damage marker 8-oxo-dG using cysteamine-stabilised gold nanoparticles
Source: Royal Society of Chemistry journal article supplement (doi:10.1039/d2ra01858f), 2022-01-01
Supplement: d2ra01858f1.pdf [file d2ra01858f1.pdf]

## Supporting Information for

### Aptamer-based colorimetric detection of the DNA damage marker 8-oxo-dG using cysteamine-stabilized gold nanoparticles

Chadamas Sakonsinsiri<sup>a,b,\*</sup>, Theerapong Puangmali<sup>c</sup>, Kaniknun Srijiwangsa<sup>a</sup>,  
Sireemas Koowattanasuchat<sup>a</sup>, Raynoo Thanan<sup>a,b</sup>, Apiwat Chompoosor<sup>d</sup>, Sirinan Kulchart<sup>e</sup>  
and Paiboon Sithithaworn<sup>f</sup>

<sup>a</sup> *Department of Biochemistry, Faculty of Medicine, Khon Kaen University,  
Khon Kaen 40002, Thailand;*

<sup>b</sup> *Cholangiocarcinoma Research Institute, Khon Kaen University,  
Khon Kaen, Thailand 40002;*

<sup>c</sup> *Department of Physics, Faculty of Science, Khon Kaen University,  
Khon Kaen 40002, Thailand;*

<sup>d</sup> *Department of Chemistry, Faculty of Science, Ramkhamhaeng University,  
Bangkok 10240, Thailand;*

<sup>e</sup> *Department of Chemistry, Faculty of Science, Khon Kaen University,  
Khon Kaen 40002, Thailand;*

<sup>f</sup> *Department of Parasitology, Faculty of Medicine, Khon Kaen University,  
Khon Kaen 40002, Thailand*

\* *Corresponding Author. E-mail: schadamas@kku.ac.th*

## Synthesis of cysteamine-stabilized AuNPs (Cyst-AuNPs)

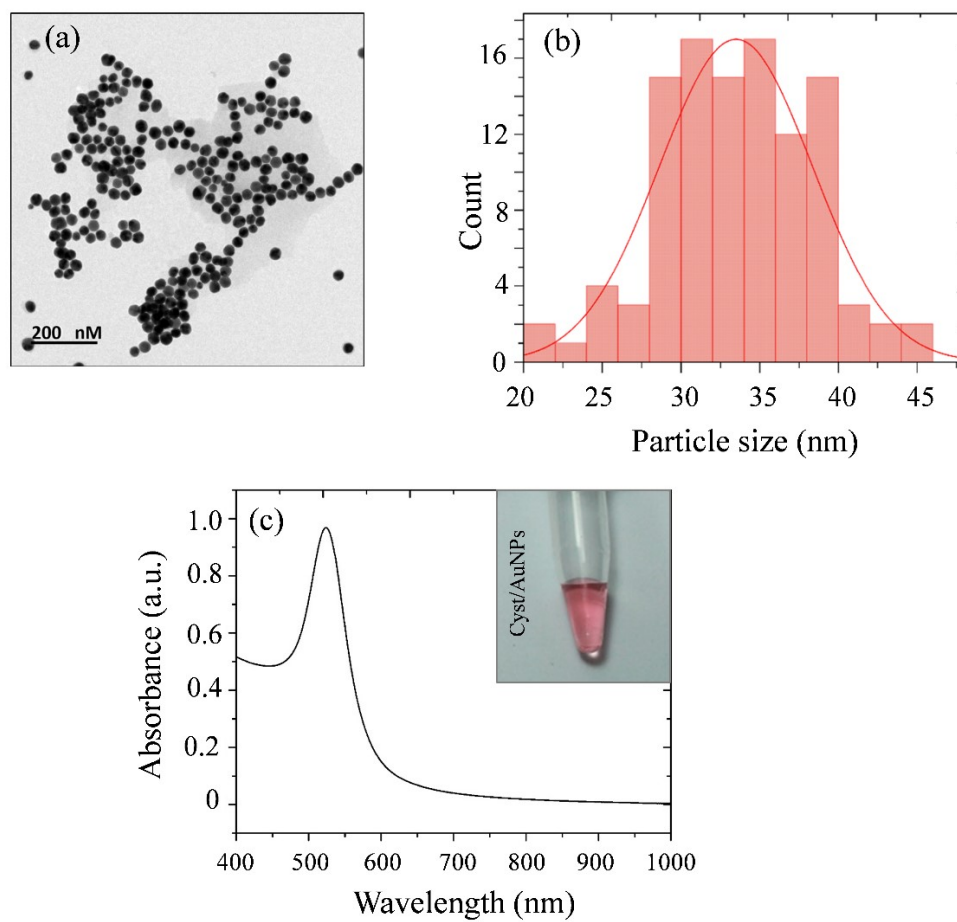

**Fig. S1.** (a) TEM image of Cyst-AuNPs. (b) Size distribution of Cyst-AuNPs. (c) Absorption spectrum and observation (Inset) of Cyst-AuNPs.

## Optimization of the sensing parameters by fixing 8-oxo-dG concentration at 12 nM

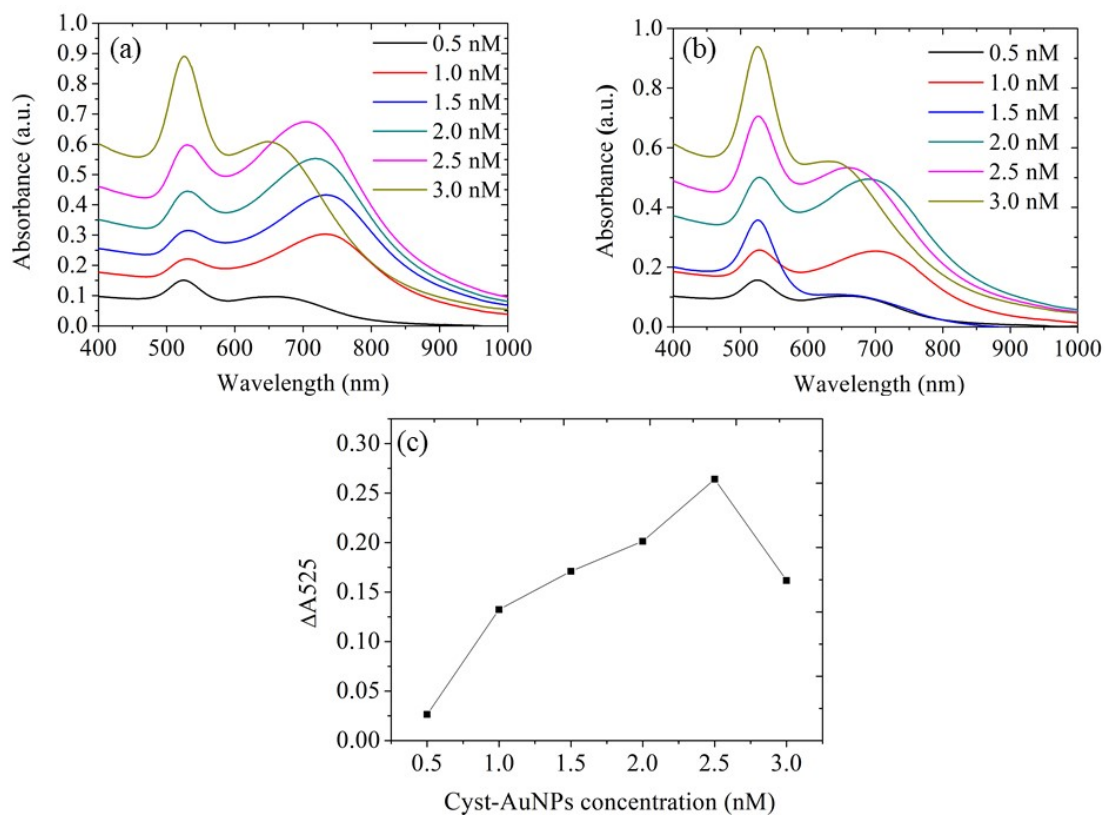

**Fig. S2.** Effects of Cyst-AuNPs concentrations on the performance of 8-oxo-dG colorimetric detection system: (a) UV-Vis absorption spectra of the Cyst-AuNPs + Aptamer; (b) UV-Vis absorption spectra of the Cyst-AuNPs + Aptamer + 8-oxo-dG; (c) the difference in absorbance at 525 nm ( $\Delta A_{525}$ ). Experimental conditions: Aptamer, 5 nM; 8-oxo-dG, 12 nM; Phosphate buffer, 1 mM, pH 7.0.

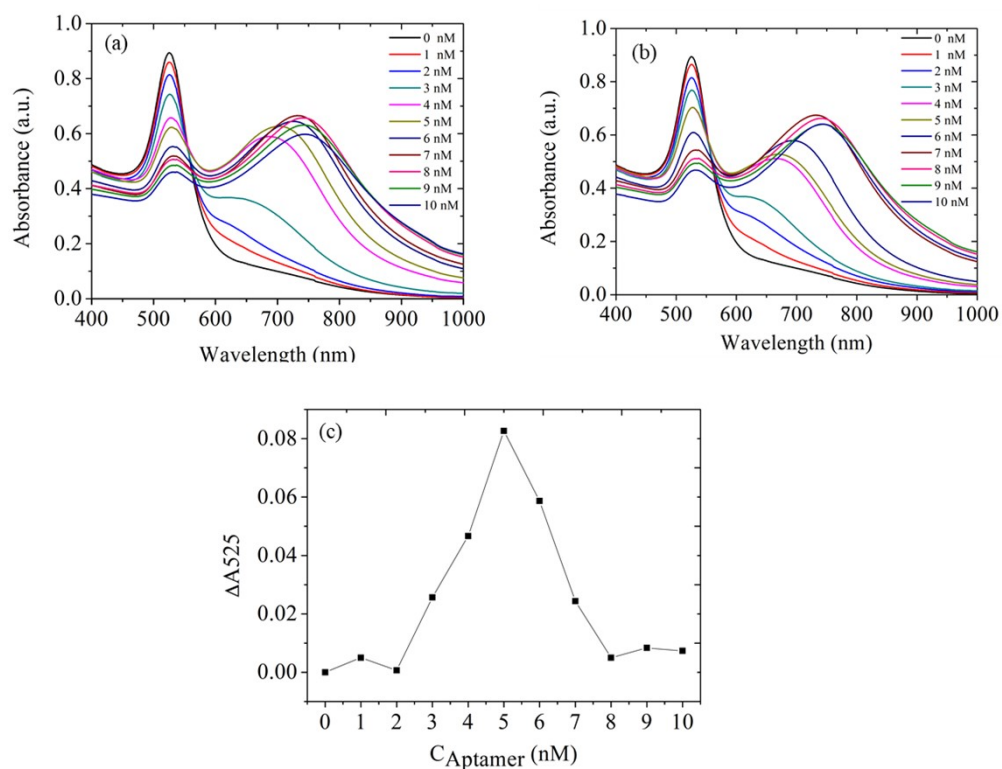

**Fig. S3.** Effects of aptamer concentrations on the performance of 8-oxo-dG colorimetric detection system: a) UV-Vis absorption spectra of the Cyst-AuNPs + Aptamer; (b) UV-Vis absorption spectra of the Cyst-AuNPs + Aptamer + 8-oxo-dG; (c) the difference in absorbance at 525 nm ( $\Delta A_{525}$ ). The final concentrations of aptamers were 0, 1, 2, 3, 4, 5, 6, 7, 8, 9 and 10 nM. Experimental conditions: Cyst-AuNPs, 2.5 nM; Phosphate buffer, 1 mM, pH 7.0.; 8-oxo-dG, 12 nM.

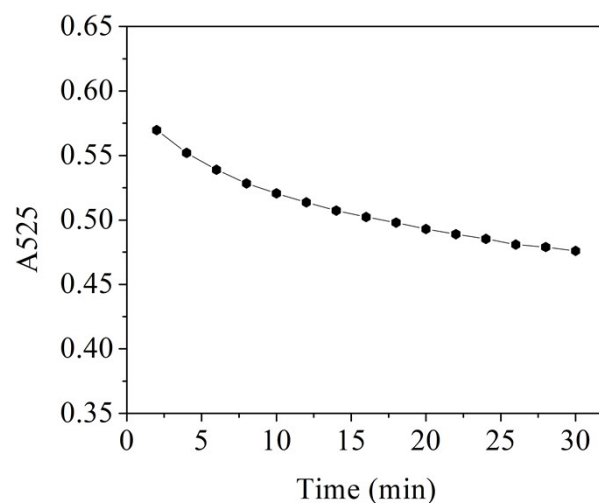

**Fig. S4.** Optimization of the incubation time of aptamer with Cyst-AuNPs. The concentration of 8-oxo-dG was 12 nM. Experimental conditions: Cyst-AuNPs, 2.5 nM, Aptamer, 5 nM; Phosphate buffer, 1 mM, pH 7.0.

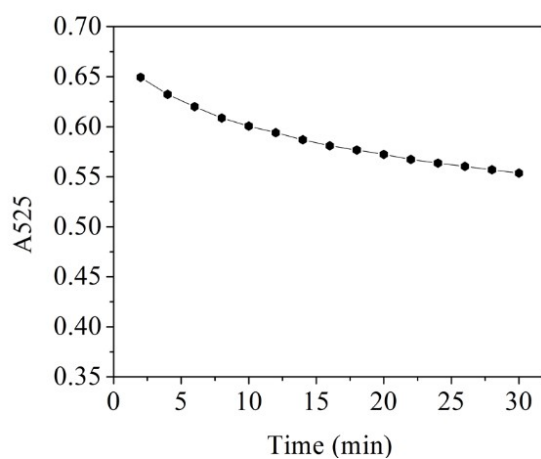

**Fig. S5.** Optimization of the binding time of aptamer with 8-oxo-dG. Experimental conditions: Cyst-AuNPs, 2.5 nM, Aptamer, 5 nM; 8-oxo-dG, 12 nM; Phosphate buffer, 1 mM, pH 7.0.

### Optimization of the sensing parameters by fixing 8-oxo-dG concentration at 50 nM

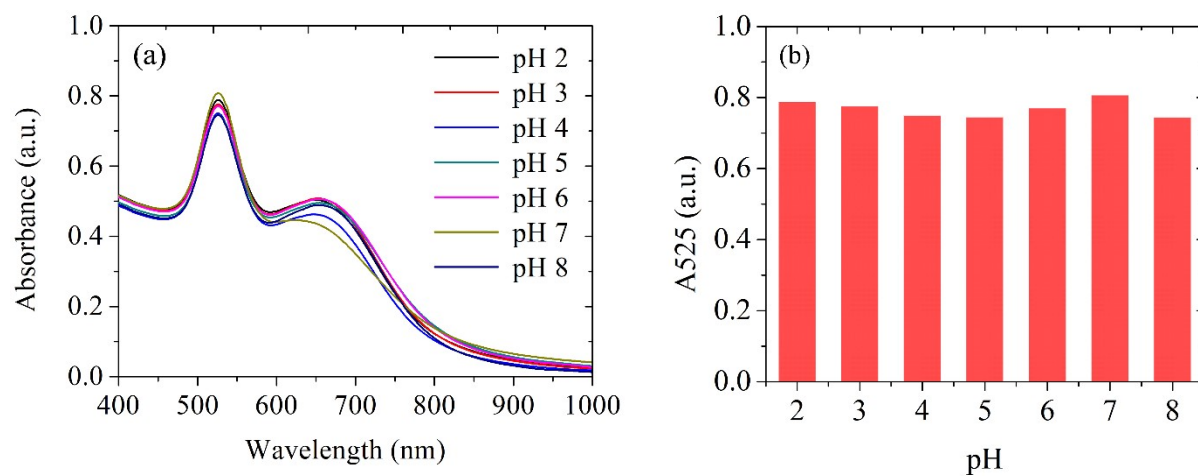

**Fig. S6** Effects of pH on the performance of 8-oxo-dG colorimetric detection system: (a) UV-Vis absorption spectra of the 8-oxo-dG colorimetric detection system; (b) The absorbance at 525 nm ( $A_{525}$ ) at different pH, ranging from 2.0-8.0. Experimental conditions: Cyst-AuNPs, 2.5 nM; Aptamer, 5 nM; 8-oxo-dG, 50 nM.

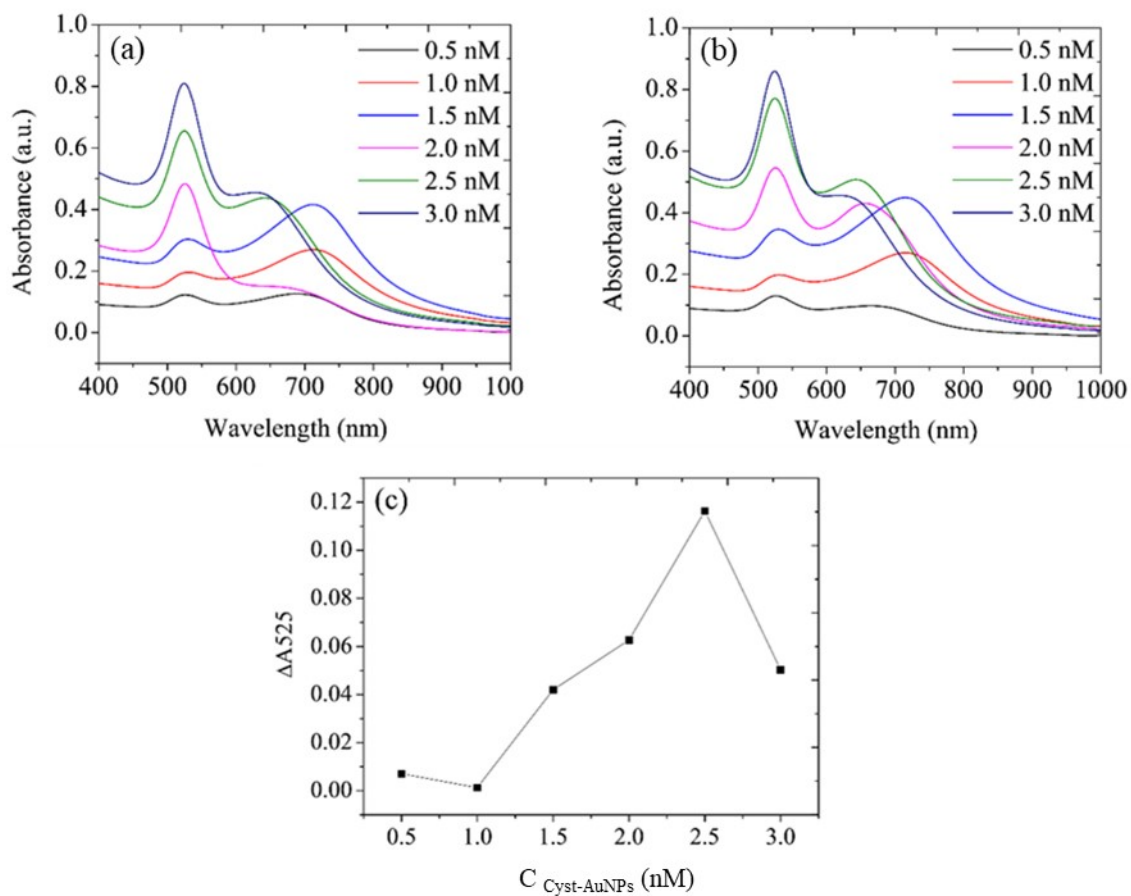

**Fig. S7.** Effects of Cyst-AuNPs concentrations on the performance of 8-oxo-dG colorimetric detection system: (a) UV-Vis absorption spectra of the Cyst-AuNPs + Aptamer; (b) UV-Vis absorption spectra of the Cyst-AuNPs + Aptamer + 8-oxo-dG; (c) the difference in absorbance at 525 nm ( $\Delta A_{525}$ ). Experimental conditions: Aptamer, 5 nM; 8-oxo-dG, 50 nM; Phosphate buffer, 1 mM, pH 7.0.

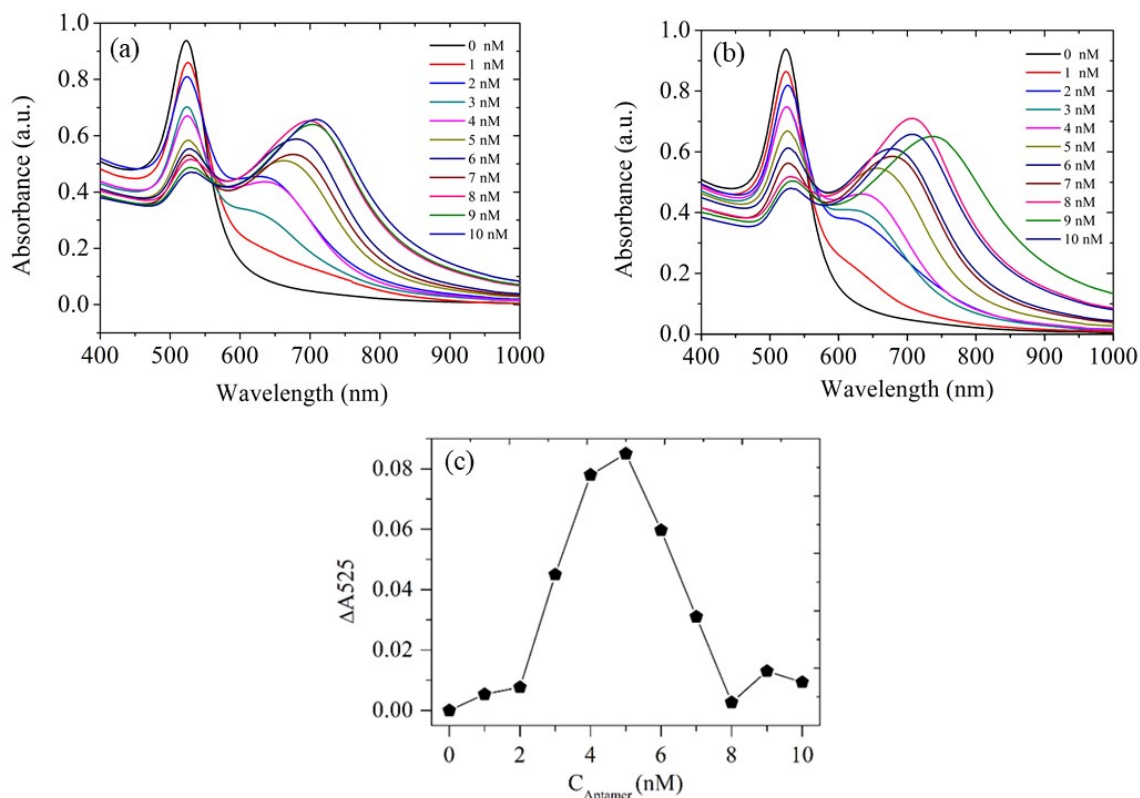

**Fig. S8.** Effects of aptamer concentrations on the performance of 8-oxo-dG colorimetric detection system: a) UV-Vis absorption spectra of the Cyst-AuNPs + Aptamer; (b) UV-Vis absorption spectra of the Cyst-AuNPs + Aptamer + 8-oxo-dG; (c) the difference in absorbance at 525 nm ( $\Delta A_{525}$ ). The final concentrations of aptamers were 0, 1, 2, 3, 4, 5, 6, 7, 8, 9 and 10 nM. Experimental conditions: Cyst-AuNPs, 2.5 nM; Phosphate buffer, 1 mM, pH 7.0.; 8-oxo-dG, 50 nM.



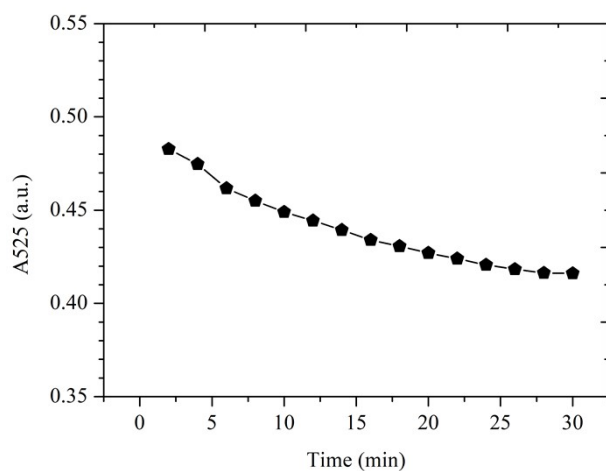

**Fig. S9.** Optimization of the incubation time of aptamer with Cyst-AuNPs. The concentration of 8-oxo-dG was 50 nM. Experimental conditions: Cyst-AuNPs, 2.5 nM, Aptamer, 5 nM; Phosphate buffer, 1 mM, pH 7.0.

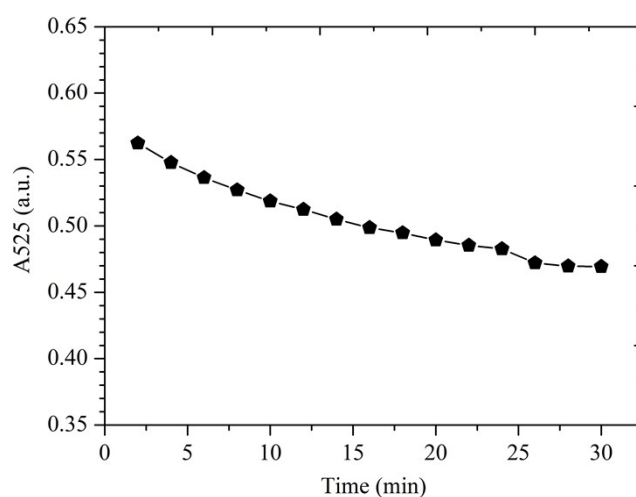

**Fig. S10.** Optimization of the binding time of aptamer with 8-oxo-dG. Experimental conditions: Cyst-AuNPs, 2.5 nM, Aptamer, 5 nM; 8-oxo-dG, 50 nM; Phosphate buffer, 1 mM, pH 7.0.

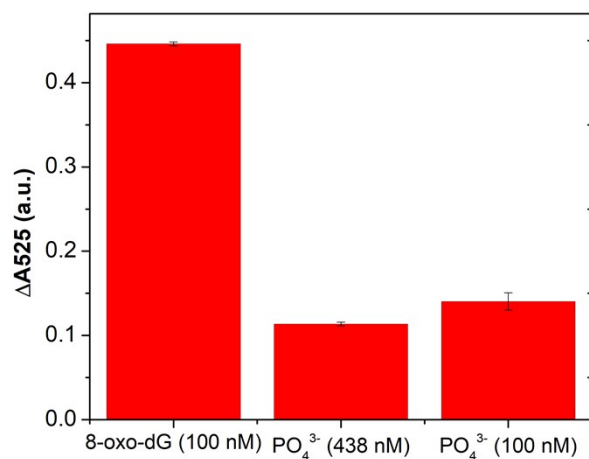

**Fig. S11.** Specificity of the aptamer-AuNPs-based colorimetric assay for 8-oxo-dG detection comparable to 438 nM and 100 nM  $PO_4^{3-}$ . The 8-oxo-dG concentration was 100 nM.

**Table S1.** Zeta potential and size distribution of the aggregate in the solution.

| Sample                                   | Zeta potential (mV) | Size determined by DLS (nm) |
|------------------------------------------|---------------------|-----------------------------|
| Cyst-AuNPs                               | $13.9 \pm 0.5$      | $42.9 \pm 2.1$              |
| Cyst-AuNPs + Aptamer                     | $18.4 \pm 1.1$      | $203.2 \pm 8.9$             |
| Cyst-AuNPs + Aptamer + 8-oxo-dG (10 nM)  | $16.9 \pm 2.9$      | $159.3 \pm 10.7$            |
| Cyst-AuNPs + Aptamer + 8-oxo-dG (50 nM)  | $16.4 \pm 0.8$      | $131.2 \pm 11.8$            |
| Cyst-AuNPs + Aptamer + 8-oxo-dG (100 nM) | $16.3 \pm 0.8$      | $114.6 \pm 13.6$            |

Note: All solutions were in phosphate buffer pH (1 mM); 2.5 nM Cyst-AuNPs and 5 nM aptamer were used in all conditions.

**Table S2.** Intra-day and inter-day precision of the proposed 8-oxo-dG detection method.

| Matrix | 8-oxo-dG (nM) | Intra-day (n = 3) |      |         | Inter-day (n = 15) |      |         |
|--------|---------------|-------------------|------|---------|--------------------|------|---------|
|        |               | Mean              | S.D. | RSD (%) | Mean               | S.D. | RSD (%) |
| Water  | 60            | 66.6              | 3.8  | 5.7     | 67.2               | 7.1  | 10.6    |
|        | 80            | 86.1              | 10.5 | 12.1    | 86.2               | 10.5 | 12.1    |
| Urine  | 60            | 67.3              | 10.0 | 14.9    | 71.4               | 8.9  | 12.4    |
|        | 80            | 83.3              | 16.4 | 19.7    | 86.6               | 7.2  | 8.4     |

S.D., standard deviation. RSD, relative standard deviation calculated as  $S.D./\text{mean} \times 100$ .
